# Supplementary material
Source: publisher figshare collection journal article supplement (https://gsajournals.figshare.com/ndownloader/files/10656817)
Supplement: Supplementary file 1 [file 10656817]

## Sheet: Sheet1
DGRP Line	Mean	SE	n
DGRP_100	204.412	17.0108	24
DGRP_101	263.827	7.9456	23
DGRP_105	195.803	18.8098	22
DGRP_109	233.543	12.3292	24
DGRP_129	236.245	12.8026	21
DGRP_136	228.068	7.79824	24
DGRP_138	199.573	14.7504	20
DGRP_142	284.483	6.84918	24
DGRP_149	243.92	9.72196	23
DGRP_153	299.541	9.0989	24
DGRP_158	183.255	5.2519	24
DGRP_161	259.02	9.53234	24
DGRP_176	279.818	7.43127	23
DGRP_177	227.774	22.9511	24
DGRP_181	240.214	7.98847	24
DGRP_189	244.117	13.1312	14
DGRP_195	203.437	11.3093	24
DGRP_208	245.951	5.46595	24
DGRP_21	193.429	15.9098	24
DGRP_217	288.228	11.8831	23
DGRP_223	121.005	18.3143	14
DGRP_227	212.895	10.4137	24
DGRP_228	241.041	9.26151	22
DGRP_229	318.465	12.4796	20
DGRP_233	197.285	13.9775	24
DGRP_235	209.783	10.7457	21
DGRP_237	249.429	10.5456	23
DGRP_239	196.691	11.3354	24
DGRP_256	185.942	9.29901	33
DGRP_26	209.626	13.1787	23
DGRP_28	270.606	7.59188	24
DGRP_280	270.722	17.1779	23
DGRP_287	225.341	6.12653	24
DGRP_301	284.868	9.7021	27
DGRP_303	261.101	13.1995	24
DGRP_304	172.649	14.2717	23
DGRP_306	149.761	12.4756	24
DGRP_307	254.929	11.8653	21
DGRP_309	250.154	9.36326	23
DGRP_31	218.005	12.9023	24
DGRP_310	174.796	14.8568	24
DGRP_313	292.134	11.2407	23
DGRP_315	369.114	8.11929	24
DGRP_317	292.873	11.6731	20
DGRP_318	196.014	5.83319	24
DGRP_319	192.007	5.91293	23
DGRP_32	249.061	13.0741	24
DGRP_320	171.556	12.3363	24
DGRP_321	284.675	12.5227	23
DGRP_324	386.106	7.80818	24
DGRP_332	262.532	16.8273	24
DGRP_335	97.2459	12.1823	24
DGRP_336	277.145	12.6763	23
DGRP_338	333.654	7.00242	24
DGRP_340	307.376	8.8219	20
DGRP_348	283.61	7.79107	24
DGRP_350	245.654	13.0857	24
DGRP_352	209.087	17.3801	24
DGRP_354	232.982	8.05904	24
DGRP_355	173.716	8.68445	18
DGRP_356	231.958	10.4866	24
DGRP_357	236.088	6.15762	24
DGRP_358	277.749	8.09371	24
DGRP_359	209.291	9.43421	23
DGRP_360	247.345	12.1888	24
DGRP_361	179.523	14.5941	24
DGRP_362	195.988	12.8211	24
DGRP_365	198.875	8.62901	24
DGRP_367	292.807	10.844	23
DGRP_370	248.709	15.0232	27
DGRP_371	250.435	9.65571	24
DGRP_373	218.225	8.09752	24
DGRP_374	340.972	9.2445	19
DGRP_375	262.361	10.7127	24
DGRP_377	294.601	7.13937	24
DGRP_379	201.078	10.7	24
DGRP_38	228.179	9.69266	29
DGRP_380	238.493	13.4932	24
DGRP_381	175.612	13.7371	23
DGRP_382	275.548	11.1096	24
DGRP_383	250.409	6.32846	24
DGRP_385	329.511	12.7824	22
DGRP_386	315.498	7.89961	23
DGRP_390	250.063	9.89521	24
DGRP_391	256.704	6.47768	24
DGRP_392	213.774	9.30668	23
DGRP_395	299.318	11.0938	22
DGRP_397	175.591	11.4836	23
DGRP_399	329.653	10.0072	24
DGRP_40	266.488	11.9431	20
DGRP_405	277.442	10.6713	20
DGRP_406	192.056	11.688	24
DGRP_409	229.621	13.0074	24
DGRP_41	231.564	8.77557	22
DGRP_42	144.821	9.08014	28
DGRP_426	265.494	12.3428	24
DGRP_427	186.309	9.43233	23
DGRP_437	296.252	6.82501	24
DGRP_439	291.891	8.60726	24
DGRP_440	270.282	17.3109	24
DGRP_441	247.432	12.0663	24
DGRP_443	337.813	8.4709	23
DGRP_45	207.359	6.75793	24
DGRP_461	272.582	7.96937	22
DGRP_48	250.709	18.3516	23
DGRP_486	212.18	11.1489	20
DGRP_49	235.528	9.55652	24
DGRP_491	275.039	10.5126	23
DGRP_492	184.804	11.5971	23
DGRP_502	233.668	12.6879	21
DGRP_505	228.022	11.4274	22
DGRP_508	296.46	10.9409	20
DGRP_509	251.281	9.43172	24
DGRP_513	190.049	17.9913	21
DGRP_517	230.548	7.17802	24
DGRP_528	252.649	13.0057	24
DGRP_530	257.237	13.8609	23
DGRP_531	271.32	9.90429	23
DGRP_535	288.039	9.63116	24
DGRP_551	260.658	7.63933	20
DGRP_555	257.214	11.0948	24
DGRP_559	222.232	11.572	24
DGRP_563	254.072	9.07231	20
DGRP_566	277.926	16.1863	21
DGRP_57	251.834	14.6324	24
DGRP_584	301.116	10.611	24
DGRP_589	180.66	11.0574	22
DGRP_59	201.513	12.4757	24
DGRP_595	313.584	8.66914	24
DGRP_596	216.109	12.0874	24
DGRP_627	247.483	14.35	23
DGRP_630	196.746	6.8785	24
DGRP_634	170.185	12.3366	24
DGRP_639	203.156	15.5283	23
DGRP_642	168.257	10.9645	24
DGRP_646	140.287	7.8667	24
DGRP_69	239.22	7.98577	23
DGRP_703	253.188	13.9209	23
DGRP_705	273.548	9.08742	24
DGRP_707	271.889	13.6243	24
DGRP_712	267.541	7.76026	24
DGRP_714	234.943	13.1235	23
DGRP_716	264.195	9.44442	24
DGRP_721	244.296	7.19032	24
DGRP_727	157.688	10.361	24
DGRP_73	218.342	11.8933	24
DGRP_730	199.29	9.51623	22
DGRP_732	264.92	9.40918	24
DGRP_737	308.716	11.1045	24
DGRP_738	264.407	11.856	24
DGRP_748	217.414	14.4173	24
DGRP_75	255.791	8.74101	20
DGRP_757	215.829	8.22894	24
DGRP_761	185.471	7.01885	24
DGRP_765	262.781	12.8067	24
DGRP_774	272.56	9.74488	24
DGRP_776	210.781	12.583	22
DGRP_783	158.932	9.28039	22
DGRP_786	185.936	13.8657	23
DGRP_787	202.498	6.45789	24
DGRP_790	279.951	11.9635	23
DGRP_796	288.872	12.1951	23
DGRP_799	236.535	16.8469	23
DGRP_801	210.55	10.4437	24
DGRP_802	276.628	9.19611	24
DGRP_804	194.37	5.87747	24
DGRP_805	280.081	10.0875	23
DGRP_808	239.738	8.58366	24
DGRP_810	323.22	9.60448	24
DGRP_812	252.135	12.6249	24
DGRP_818	213.733	10.9713	23
DGRP_819	235.574	13.2136	24
DGRP_820	243.512	12.9097	24
DGRP_821	196.41	11.47	24
DGRP_822	225.119	7.48566	24
DGRP_83	250.718	12.6245	22
DGRP_832	177.366	7.85614	23
DGRP_837	250.983	13.6587	24
DGRP_843	213.542	8.3424	20
DGRP_849	168.98	10.5971	24
DGRP_85	300.425	8.49381	24
DGRP_850	315.061	12.9049	24
DGRP_852	278.803	9.0574	24
DGRP_853	237.66	8.34336	28
DGRP_855	190.99	9.92905	24
DGRP_857	259.677	12.2837	24
DGRP_859	190.487	7.54966	24
DGRP_861	218.245	8.33319	24
DGRP_879	231.607	10.46	24
DGRP_88	240.145	16.9535	23
DGRP_882	249.009	6.57386	23
DGRP_884	285.486	17.4772	24
DGRP_887	227.627	8.1688	24
DGRP_890	201.875	9.33106	24
DGRP_892	231.486	9.78031	23
DGRP_894	212.081	7.98502	24
DGRP_897	279.745	8.25103	24
DGRP_900	270.527	13.4844	23
DGRP_907	207.551	9.70713	24
DGRP_908	217.653	11.4931	24
DGRP_91	249.884	12.5047	24
DGRP_911	275.636	13.2742	24
DGRP_913	197.503	7.47522	24
DGRP_93	315.045	7.47368	24
